## RESEARCH ARTICLE

# The dorsal blastopore lip is a source of signals inducing planar cell polarity in the *Xenopus* neural plate

Pamela Mancini, Olga Ossipova and Sergei Y. Sokol\*

## ABSTRACT

Coordinated polarization of cells in the tissue plane, known as planar cell polarity (PCP), is associated with a signaling pathway critical for the control of morphogenetic processes. Although the segregation of PCP components to opposite cell borders is believed to play a critical role in this pathway, whether PCP derives from egg polarity or preexistent long-range gradient, or forms in response to a localized cue, remains a challenging question. Here we investigate the *Xenopus* neural plate, a tissue that has been previously shown to exhibit PCP. By imaging Vangl2 and Prickle3, we show that PCP is progressively acquired in the neural plate and requires a signal from the posterior region of the embryo. Tissue transplantations indicated that PCP is triggered in the neural plate by a planar cue from the dorsal blastopore lip. The PCP cue did not depend on the orientation of the graft and was distinct from neural inducers. These observations suggest that neuroectodermal PCP is not instructed by a preexisting molecular gradient but induced by a signal from the dorsal blastopore lip.

**KEY WORDS:** Vangl2, Prickle3, PCP, Induction, Neuroectoderm, *Xenopus* embryos, Dorsal blastopore lip, Signaling

## INTRODUCTION

During morphogenesis, collective cell behaviors may be orchestrated in a multicellular organism through the integration of individual polarities of constituent cells. The coordinated polarization of neighboring cells in the plane of the tissue is known as planar cell polarity (PCP). Genetic studies have implicated PCP components in many morphogenetic processes, including vertebrate neurulation, lung and kidney development and left–right patterning, and mutations in PCP genes have been linked to birth defects in humans (Goodrich and Strutt, 2011; Gray et al., 2011; Nikolopoulou et al., 2017; Tian et al., 2020). The core PCP pathway, initially identified in *Drosophila*, comprises two protein complexes: Frizzled/Dishevelled and Prickle/Van Gogh (Vangl in vertebrates) that segregate to opposite cell borders (Devenport, 2014; Goodrich and Strutt, 2011; Vladar et al., 2009). Both PCP complexes also include the atypical cadherin Flamingo (Celsr in vertebrates). These core proteins are part of a signaling pathway that regulates cell shape and motility through the action of multiple

effectors, including components of the vesicular trafficking machinery and cytoskeleton-remodeling factors (Butler and Wallingford, 2017; Devenport, 2014).

PCP protein segregation to opposite cell sides is reinforced by reciprocal intracellular repulsion and extracellular stabilization of core complexes (Aw and Devenport, 2017; Fisher and Strutt, 2019; Peng and Axelrod, 2012), but an initial cue is needed to define the orientation of the polarity vector relative to the body axes. Molecular gradients have been considered as primary candidates for PCP-instructing signals (Chu and Sokol, 2016; Gao et al., 2011; Lawrence, 1966; Wu et al., 2013). Wnt protein gradients may instruct PCP by modulating Frizzled activity in the fly wing (Wu et al., 2013), or Vangl2 phosphorylation in the mouse limb bud (Gao et al., 2011), although the involvement of the fly Wnt ligands in PCP remains controversial (Ewen-Campen et al., 2020). Alternative candidate long-range PCP cues are mechanical strains (Aigouy et al., 2010; Aw et al., 2016; Chien et al., 2015). Studies of the *Xenopus* and mammalian epidermis suggested that physical forces generated during morphogenetic processes might act to define the global PCP axis (Aw et al., 2016; Chien et al., 2015). Nevertheless, the endogenous source of PCP cues and the mechanisms through which PCP is instructed at the tissue level remain to be fully elucidated.

Here, we use the *Xenopus* embryo to investigate the dynamics and the origin of PCP in the neuroectoderm, a tissue that is planar polarized in several vertebrate models (Butler and Wallingford, 2018; Ciruna et al., 2006; McGreevy et al., 2015; Nishimura et al., 2012; Ossipova et al., 2015b). In principle, this polarity may derive from the existing egg polarity, e. g. animal–vegetal molecular gradient, or forms in response to a localized cue. Our tissue manipulation experiments suggest that the neuroepithelial PCP is progressively specified along the anteroposterior body axis. We propose that PCP is not defined by a preexisting gradient but is induced by a planar signal from the dorsal blastopore lip.

## RESULTS

### Progressive posterior-to-anterior acquisition of PCP in the *Xenopus* neural plate

In *Xenopus* midneurula embryos, endogenous Vangl2 and exogenous fluorescent Prickle3 form crescent-shaped aggregates at the anterior borders of neuroepithelial cells (Fig. S1) (Ossipova et al., 2015b). The anterior position of these aggregates has been established based on the staining of cells mosaically-expressing exogenous fluorescent PCP proteins and in morpholino-mediated knockdowns (Chuykin et al., 2018; Ossipova et al., 2015b) and it has been verified in our experiments. To investigate the spatial and temporal dynamics of PCP proteins in the *Xenopus* neural plate (NP), we performed time-lapse imaging of embryos expressing HA-Vangl2 and GFP-Prickle3 (GFP-Pk3) from late gastrula to midneurula stages (Fig. 1A–C"; Movie 1). At stage 12.5, GFP-Pk3 aggregates were observed only in a few interspersed cells (Fig. 1A–A"). Shortly after, GFP-Pk3 crescents were visible in the posterior NP, while only a few small aggregates

Department of Cell, Developmental and Regenerative Biology, Icahn School of Medicine at Mount Sinai, New York, NY 10029, USA.

\*Author for correspondence (sergei.sokol@mssm.edu)

 S.Y.S., 0000-0002-3963-9202

This is an Open Access article distributed under the terms of the Creative Commons Attribution License (<https://creativecommons.org/licenses/by/4.0>), which permits unrestricted use, distribution and reproduction in any medium provided that the original work is properly attributed.

Received 12 April 2021; Accepted 4 June 2021

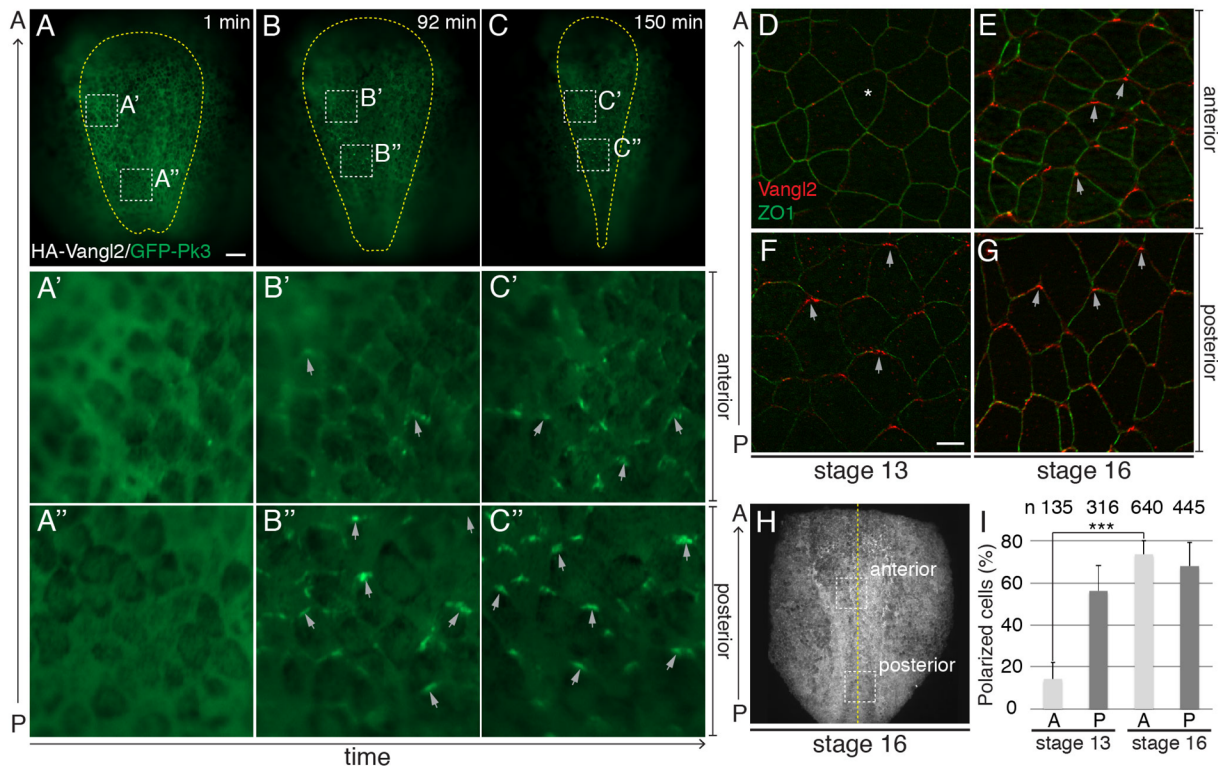

**Fig. 1. Progressive posterior-to-anterior acquisition of PCP in the *Xenopus* neural plate.** (A–C'') Still frames (dorsal view) of time-lapse imaging (stages 12.5 to 16) of a *Xenopus* embryo, expressing HA-Vangl2 and GFP-Pk3. Scale bar in A, 100  $\mu$ m, also refers to B and C. Yellow line delimits the NP. Boxed regions in panels A–C are enlarged in A'–C''. Grey arrows, GFP-Pk3 crescent orientation. The results are representative of three independent experiments. (D–G) Vangl2 and ZO1 immunostaining of NP. ZO1 demarcates cell borders. Arrows, anterior Vangl2. Asterisk, lack of anterior Vangl2. The anteroposterior (A–P) axis is indicated. Scale bar, 10  $\mu$ m in F, also refers to D, E and G. (H) Stage 16 embryo at low magnification. Boxed regions, approximate positions of images in (D–G). Yellow line, midline. (I) Percentage of cells with polarized Vangl2 relative to the total number of ZO1-positive cells. n, number of cells per group. Means and s.d. are shown. Two-tailed Student's *t*-test, \*\*\* $P=1.5e^{-6}$ .

were evident in the anterior region (Fig. 1B–B''). GFP-Pk3-containing complexes became prominent in both the anterior and the posterior NP only by stage 15 or 16 (Fig. 1C–C''). Of note, the formation of GFP-Pk3 aggregates correlated with the areas of cell displacement that were visible during NP elongation (Movie 1). This analysis indicates that the NP acquires PCP in the posterior-to-anterior direction and in parallel with early morphogenetic events. This conclusion was confirmed by immunostaining for endogenous Vangl2. Vangl2 crescents were detectable only in the posterior NP at stage 13, but they became visible in the whole NP at stage 15 or 16 (Fig. 1D–I). Together, these experiments show the progressive acquisition of neuroectodermal PCP.

#### Posterior origin and planar propagation of the PCP cue

The posterior-to-anterior acquisition of PCP in the NP led us to hypothesize that the instructing cue originates at the posterior end of the embryo. Alternatively, PCP may independently develop in the anterior and posterior regions of the NP in a stage-dependent manner. To distinguish between these possibilities, we examined PCP in the NP, in which the continuity between the posterior and the anterior portions has been mechanically disrupted. A mediolaterally-oriented microsurgical incision (MLI) was introduced approximately in the middle of the neural *anlagen* at late gastrula stage (Fig. 2A; Fig. S2A,B), and Vangl2 immunolocalization was analyzed in the operated and control embryos at stage 15. The incisions affected only the ectodermal layers, with the underlying mesendoderm remaining intact, thereby allowing to distinguish between 'planar' (i.e. transmitted in the plane) and 'vertical' (i.e. arising from the

underlying mesendoderm) signals. Importantly, the microsurgical procedure did not compromise neural induction in manipulated embryos, as confirmed by the expression of the pan-neural marker Sox3 (Fig. 2B–D). As expected, Vangl2 was enriched at the anterior borders of most cells of the control NP (Fig. 2B–B''). In the embryos with the MLI carried out at stage 11.5, Vangl2 remained polarized posterior to the cut, but little if any polarization was observed anterior to the wound (Fig. 2C–C'',E). When the same surgery was done at stage 13, Vangl2 polarization was only slightly affected in the anterior NP (Fig. 2D,E). Incisions made along the anteroposterior axis did not produce any significant change in Vangl2 crescent orientation (Fig. S2C–F'). These experiments indicate that the PCP signal requires tissue integrity for its transmission, propagates in the plane of the neuroectoderm, is distinct from neural inducers and acts at late gastrula-early neurula stages. These results also support our hypothesis regarding the posterior source of the PCP cue.

To further address the origin and the transmission mode of the PCP signal, we analyzed Vangl2 distribution in exogastrulating embryos, in which the involution of mesendoderm does not occur (Holtfreter, 1933). Whereas in normal embryos, the neuroectoderm overlays the mesendoderm, in exogastrulae, these tissues are planarly connected by a stalk, corresponding to the posterior end of the embryo (Fig. 3A,B). This tissue rearrangement allows discrimination between planar and vertical signal transmission. In normal neurulae, both the NP and the gastrocoel roof plate (GRP), an equivalent of the mammalian node, are planar polarized (Antic et al., 2010; Borovina et al., 2010; Chu et al., 2016;

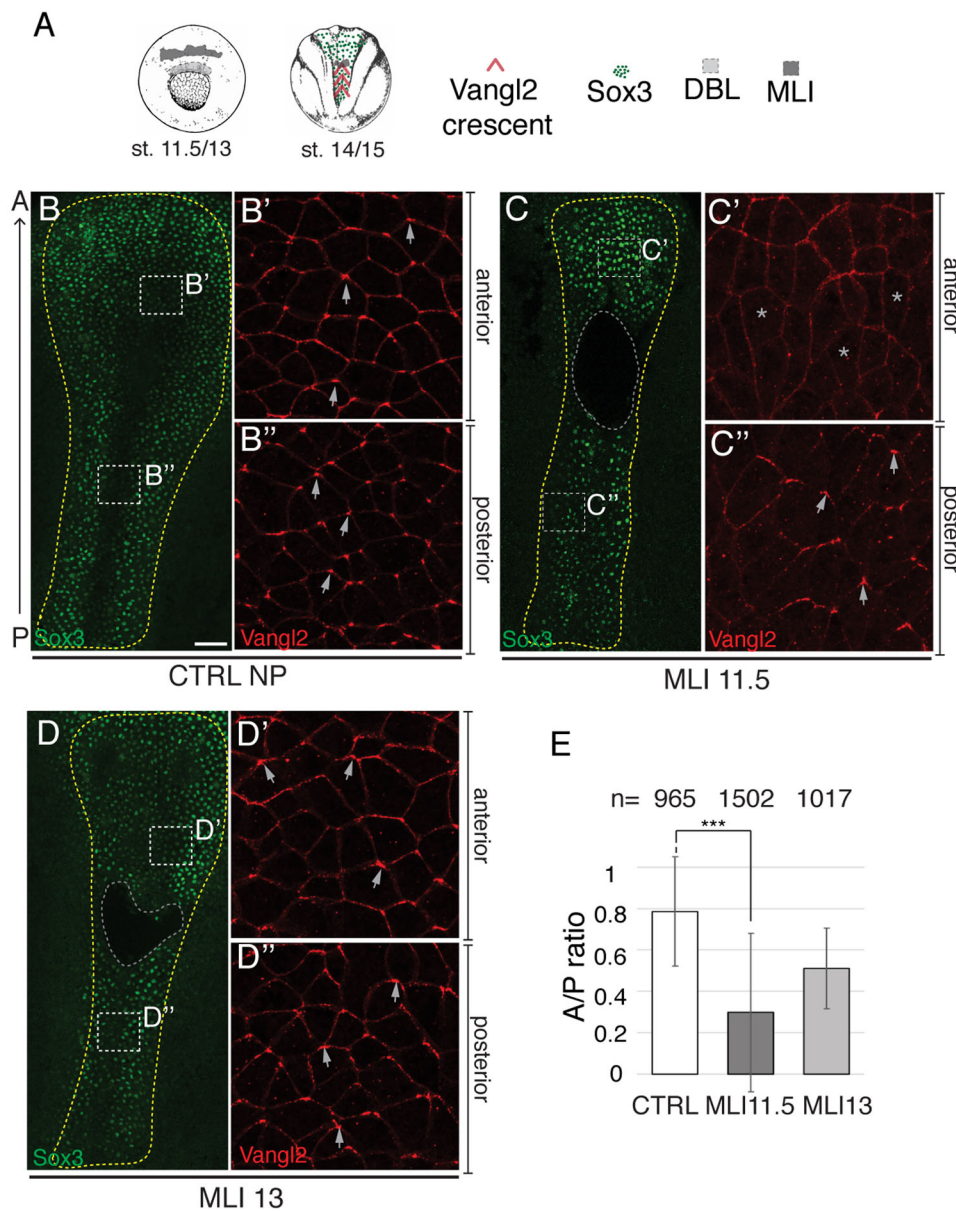

**Fig. 2. Posterior origin and planar propagation of the PCP cue.**

(A) Schematic of the experiment. Mediolateral incisions (MLI) were made at stage 11.5 (MLI11.5) or stage 13 (MLI13). (B–D'') Representative neural plates (NP) double immunostained for Vangl2 and Sox3. (B–B'') Control unmanipulated embryo (CTRL, stage 15,  $N=3$ ). (C–C'') MLI11.5 embryo ( $N=6$ ). Asterisks in C' mark the cells with lack of Vangl2 polarization. (D–D'') MLI13 embryo ( $N=5$ ). Boxed regions in B, C and D are magnified in B', B'', C', C'', D' and D''. Yellow line delimits the NP. Grey line indicates MLI. Arrows show Vangl2 crescent orientation. N, number of embryos examined. Scale bar in B, 100  $\mu\text{m}$ , also refers to C and D. (E) Ratio of the frequencies of polarized cells in the anterior and posterior NP (A/P ratio). n, number of cells per group. This is representative of three to four independent experiments. Means and s.d. are shown. Two-tailed Student's *t*-test, \*\*\* $P=0.00038$ .

Hashimoto et al., 2010). In exogastrulae, a change in the orientation of the NP and the GRP polarity vectors may provide insight about the source of the PCP cue (Fig. 3C,D). Both the NP and GRP cells exhibited Vangl2 enrichment at anterior cell borders of stage 15 control embryos as expected (Fig. 3E,E'). In the exogastrulae, Vangl2 accumulated in both tissues at the cell borders distal from the stalk (Fig. 3F,F'), indicating that the polarizing signal emanates from the posterior region of the embryo. Moreover, since neuroectodermal PCP is preserved even after the displacement of the underlying mesoderm, the signal is likely to propagate in the plane of the tissue.

#### The dorsal blastopore lip exhibits PCP-inducing activity

Our results suggest that the dorsal blastopore lip (DBL) at the posterior end of the embryo is the source of the PCP cue. To test this hypothesis, we grafted the DBL or the ventral epidermis (VE) of a donor embryo into the prospective NP of a recipient embryo at stage 12/12.5 and assessed Vangl2 localization at stage 15 (Fig. 4A–C, Fig. S3). Vangl2 accumulation was clearly visible at

the anterior cell borders in the entire NP of control embryos (Fig. S3C–E'). However, in recipient embryos, Vangl2 crescents oriented posteriorly in the cells within 150  $\mu\text{m}$  of the DBL graft, yet remained unaffected at a distance (Fig. 4D,F; Fig. S3F). PCP reversals were accompanied by the change in cell and tissue shape. Specifically, the tricellular junctions, frequently associated with the sites of Vangl2 accumulation (Ossipova et al., 2015b), were visible at the posterior cell edge rather than the anterior edge as in the control NP (Fig. 4D,F; Fig. S4). Of note, we often observed radial orientation of Vangl2 crescents relative to the transplanted tissue (Fig. S4). By contrast, after VE grafting, Vangl2 aggregates retained the normal orientation at the anterior of each cell (Fig. 4E,G; Fig. S3F), indicating that the observed PCP reversal was not due to the microsurgical procedure itself. Notably, ventral blastopore lip (VBL) grafts also showed a weak PCP-inducing activity when grafted into the neural *anlagen* (Fig. S4).

To confirm these findings, we performed the grafting to recipient embryos expressing exogenous HA-Vangl2 and GFP-Pk3. Supporting the previous conclusion, DBL but not VE grafts

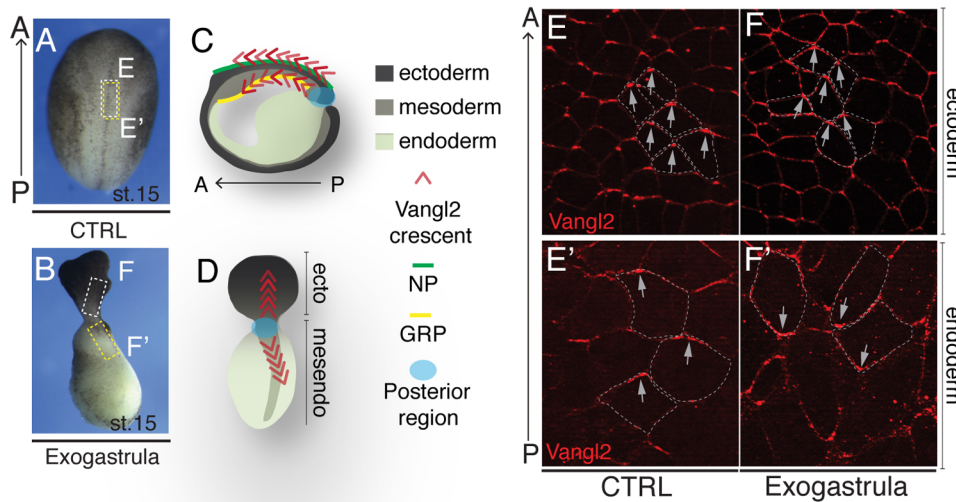

**Fig. 3. Vangl2 polarization in exogastrulae.** (A,B) Brightfield images of control (CTRL, A) and exogastrula (B) embryos at neurula stage. (C,D) Schematic of normal (C) and exogastrula (D) embryos. (E–F') Representative Vangl2 immunostaining of neuroectoderm (E,F, white boxes) or endoderm (gastrocoel roof plate, GRP) for normal embryos (E',F', yellow boxes). Grey arrows, Vangl2 aggregate orientation. White dashes outline cell borders. Data represent three independent experiments with two to six embryos per group.

caused GFP-Pk3 polarity reversals in the neuroectoderm in the majority of the recipient embryos (Fig. 4H–I'). Together, these experiments demonstrate that the DBL is a source of the PCP instructing signal (Fig. 4J).

## DISCUSSION

This study evaluated the dynamics of PCP protein localization to investigate how PCP is established in the vertebrate NP. Our spatiotemporal analysis suggests that PCP is progressively established in the NP in the posterior-to-anterior direction. Also, the anterior NP does not acquire PCP, when ectoderm integrity is disrupted at the midgastrula stage. Based on this evidence, we propose that PCP is not derived from the oocyte polarity or instructed by a pre-established gradient, but is induced at the end of gastrulation by a signal or signals from the dorsal blastopore lip. Since only the ectoderm germ layer has been disrupted in our experiments, the PCP-instructing signal must be transmitted through the plane of the tissue. This conclusion is consistent with our finding that PCP is preserved in exogastrulae. By contrast, neural induction appears to only partly rely on planar signaling (Poznanski and Keller, 1997). We further found that blastopore lip grafts re-orient Vangl2 and GFP-Prickle3 crescents away from the graft. Taken together, these experiments argue that PCP is acquired in the neuroectoderm response to a planar cue originating in the DBL (Fig. 4J). Thus, our work provides the first evidence of PCP induced by a dorsal lip transplant.

Whereas we have demonstrated that neuroectodermal PCP arises in response to inductive signaling, our current experiments do not show whether the same signal is involved in PCP maintenance nor they reveal the identity of the PCP cue(s). The PCP-instructing signal could be a diffusible molecule or a mechanical force that is transmitted through the plane of the tissue. Furthermore, core protein bridges between neighboring cells are likely to contribute to PCP, reflecting domineering non-autonomy that was described in both *Drosophila* and vertebrate models (Mitchell et al., 2009; Sienknecht et al., 2011; Vinson and Adler, 1987). These possibilities are not mutually exclusive. Importantly, the PCP-instructing activity of the DBL appears distinct from the organizer signals mediating neural induction (De Robertis and Kuroda, 2004; Harland, 2000). First, mediolateral incisions prevent PCP establishment in the anterior NP, but do not interfere with neural induction as manifested by Sox3 expression. Second, both the DBL and the VBL contain PCP-instructing activity, even though the VBL is not able to induce neural tissue. Third, PCP reversals in the NP do

not depend on graft orientation, arguing against an axis-inducing activity being responsible for PCP. Notably, Vangl2 retained its original polarization further away from the graft, suggesting that the ability of the polarizing signal to propagate in the tissue is limited or that the endogenous PCP-instructing cue dominates over the one from the graft.

Evidence has been accumulating for biochemical signals and physical forces as alternative long-range PCP cues. Wnt gradients have been proposed to control PCP by modulating Frizzled (Minegishi et al., 2017; Wu et al., 2013) or Vangl2 activity (Gao et al., 2011; Yang et al., 2017), or by affecting tissue growth and morphogenesis (Sagner et al., 2012). In fact, our previous study indicated that Wnt11b is both necessary and sufficient for early PCP generation in *Xenopus* (Chu and Sokol, 2016), but whether this is a direct effect on the PCP signaling pathway remains unclear. Of note, Wnt ligands have been reported to regulate Myosin II via RhoA and ROCK activation (Habas et al., 2001; Marlow et al., 2002; Weiser et al., 2009). Importantly, Myosin II function may be essential for PCP (Ossipova et al., 2015b; Strutt et al., 1997; Winter et al., 2001). With Myosin II being a well-known force-producing molecule (Vicente-Manzanares et al., 2009), its activation by Wnt signaling would support the proposed role of mechanical strains in PCP (Aigouy et al., 2010; Aw et al., 2016; Chien et al., 2015). Whereas our experiments point to the existence of early signals that are responsible for *de novo* induction of PCP, future studies are needed to understand how this signaling is sensed and transmitted by core PCP components to connect biochemical to physical signals during PCP induction.

## MATERIALS AND METHODS

### Xenopus embryos and microinjections

*Xenopus laevis* adults were purchased from Nasco and maintained according to the NIH Guidelines for the Care and Use of Laboratory Animals. The protocol 04-1295 was approved by the IACUC of the Icahn School of Medicine at Mount Sinai, NY, USA. *In vitro* fertilization and embryo culture were performed as described previously (Dollar et al., 2005). Staging was according to (Nieuwkoop and Faber, 1967). Embryo microinjections were carried out at the 8-to-32-cell stage in 3% Ficoll 400 (Pharmacia) in 0.5 X Marc's modified Ringer's (MMR) solution (Newport and Kirschner, 1982), 10 nl of RNA solution was injected into one or two blastomeres. Embryos were cultured in 0.1 X MMR either at 14°C or room temperature (RT). All experiments were repeated at least three times, with three to ten embryos per group.

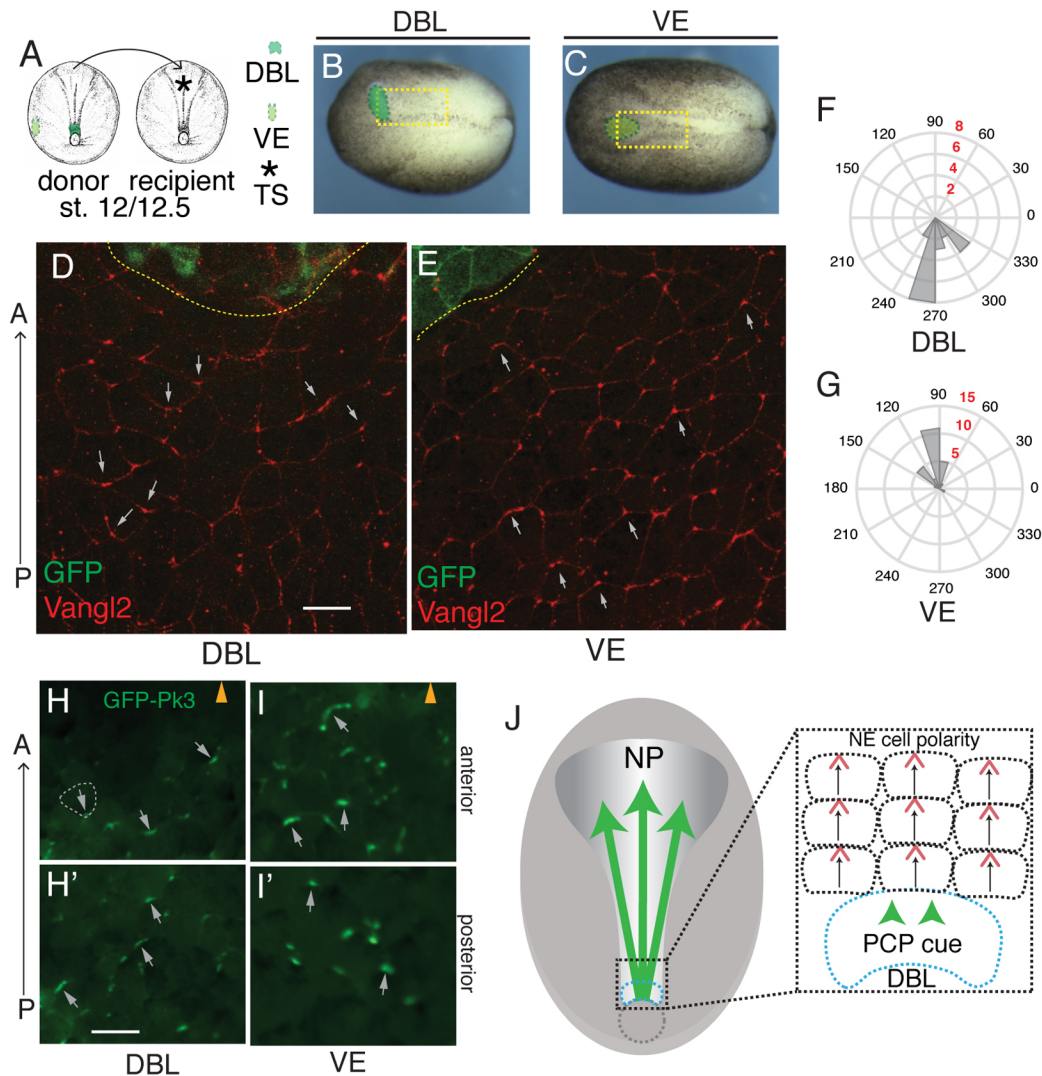

**Fig. 4. Dorsal blastopore lip grafts exhibit PCP-inducing activity.** (A) Schematic of dorsal blastopore lip (DBL) and ventral fragment (VE) grafting experiment. TS, transplantation site (asterisk). (B,C) Brightfield images of neurula embryos grafted with DBL (B) and VE (C) (green) to the anterior NP. Yellow boxes approximate the regions shown in (D) and (E). (D,E) GFP and Vangl2 immunostaining of NPs grafted with DBL (D,  $n=7$ ) or VE (E,  $n=3$ ) at stage 12/12.5. Flag-GFP RNA is graft lineage tracer. Grey arrows indicate Vangl2 aggregate orientation. Scale bar, 70  $\mu\text{m}$ , in D, also refers to E. (F,G) Rose plots quantify Vangl2 aggregate orientation within 150  $\mu\text{m}$  from the graft. (F) DBL graft, (G) VE graft. Black numbers, vector angle. Red numbers, number of aggregates per bin. These data are representative of four to five independent experiments. (H-I') Fluorescent images of NPs from DBL-graft recipient embryos (stage 15) expressing GFP-Pk3 and HA-Vangl2 (unlabeled). DBL (H,H') or VE (I,I') were grafted to the anterior NP at stage 12/12.5. Graft position is indicated by arrowheads in H and I. Images shown in H and I are proximal to the graft (within 150  $\mu\text{m}$ ) (labeled as anterior), whereas H' and I' are more distal, from the posterior region of the NP (labeled as posterior). White dashed line indicates cell borders in (H). Grey arrows show GFP-Pk3 crescent orientation. Scale bar, 60  $\mu\text{m}$ , in H, also refers to H', I and I'. The images are representative of four to five independent experiments, each including two to six embryos per group. (J) Planar induction of PCP during gastrulation. PCP is induced in the neuroectoderm by a signal from the dorsal lip and likely propagates across the tissue by a cell contact-mediated process.

#### Plasmids, mRNA synthesis and knockdown experiments

Capped RNAs were synthesized by *in vitro* transcription from the T7 or SP6 promoters using mMessage mMachine kit (Ambion) from the plasmids encoding HA-Vangl2 (Ossipova et al., 2015b), GFP-Pk3 (Chu et al., 2016), Flag-GFP (Chu et al., 2016). RNAs were injected at the following doses: HA-Vangl2 (60 pg), GFP-Pk3 (150 pg), Flag-GFP (100 pg), memRFP (100 pg).

#### Embryo microinjections and microsurgical manipulations

For incision experiments, embryos were cultured in 0.1 X MMR until stage 11.5 or 13, then were devitellinized and an incision was made along the desired axis using a glass needle in 0.1 X MMR. The

incisions were made through the ectoderm only, with mesoderm remaining unaffected. The embryos developed in 0.1 X MMR at RT until midneurula stage, wound healing was prevented by repetitive separation of the wound margins with a glass needle every 10–20 min. Manipulated embryos and control siblings were fixed at stages 15–16 for immunofluorescence analysis.

For grafting experiments in wild-type recipients, donor embryos were injected in one ventral or dorsal marginal blastomere with Flag-GFP RNA (100 pg, lineage tracer). Injections were performed at the 32-cell stage to minimize gastrulation defects and assure transplantation of the desired region. For grafting experiment in recipient embryos expressing exogenous PCP markers, recipient

embryos were coinjected with HA-Vangl2 (60 pg) and GFP-Pk3 (150 pg) RNA in two animal dorsal blastomeres at the eight-cell stage, donor embryos were injected with memRFP RNA (100 pg) in one animal ventral or dorsal marginal blastomere at the 32-cell stage. Both donor and recipient embryos were cultured in 0.1 X MMR until stage 12/12.5, then transferred in 1 X MMR with 50 µg/ml of gentamicin (Sigma-Aldrich) for the microsurgical procedure. Both recipient and donor embryos were devitellinized, the DBL, VBL or VE (corresponding to an area of approximately 0.02/0.03 mm<sup>2</sup>) were excised from the donor embryo, the explanted tissue comprises all germ layers. An incision was then made in the neural *anlagen* of the recipient embryo, in the medial-anterior position, and the graft was transferred to the recipient embryo. The superficial layer of the graft remained on the surface of the embryo, but it was randomly oriented with respect to the recipient's body axis. Grafted embryos were cultured in 1 X MMR for approximately 15–30 min, until wound healing was completed and then transferred to 0.1 X MMR, cultured until stage 14/15 at RT and fixed for staining and imaging.

Exogastrulation was induced by placing embryos into 1 X MMR at stage 7, control sibling embryos were cultured in parallel in 0.1 X MMR. The exogastrulae and the control embryos were devitellinized at stage 10 and cultured at 14°C until stage 14/15, at which point they were fixed for immunofluorescence analysis.

#### Tissue preparation, immunostaining and live imaging

For fluorescence imaging of exogenous GFP-Pk3, RNA-injected embryos were devitellinized and fixed in MEMFA (0.1 M MOPS pH 7.4, 2 mM EGTA, 1 mM MgSO<sub>4</sub> and 3.7% formaldehyde) (Harland, 1991), for 30–60 min at RT, washed in 1 X phosphate buffered saline (PBS) (5 min at RT) and stored in 1 X PBS at 4°C. Embryos were fixed at 11.5 or 15/16 in specific experiments, as described above. NPs or ventral ectoderm were manually dissected from fixed embryos with a scalpel in 1 X PBS, and mounted on slides using Vectashield mounting medium (Vector).

For immunostaining, embryos were devitellinized, fixed in 2% trichloroacetic acid (TCA) in water for 30–60 min and stained as described (Ossipova et al., 2015b). Fixed embryos were rinsed and stored in 1 X PBS at 4°C for a maximum of 5 days. NPs were manually dissected from fixed embryos, washed in 1 X PBS with 0.3% Triton X100 for 2 h at RT, then incubated in primary blocking solution (5% normal donkey serum, 1% BSA, 1% DMSO, in 1 X PBS with 0.1% Triton X100) for 2 h at RT. Samples were incubated with primary antibodies diluted in the blocking solution overnight (O/N) at 4°C, then washed five times, 1 h each, in 1 X PBS with 0.1% Triton X100, then incubated with secondary antibodies diluted in secondary blocking solution (0.1% BSA, 1% DMSO in 1 X PBS with 0.1% Triton X100) O/N at 4°C. After five washes of 1 h each in 1 X PBS with 0.1% Triton X100, NPs were mounted for imaging as described above.

The following antibodies were used: rabbit anti-Vangl2, 1:200 (Ossipova et al., 2015a), mouse anti-Sox3, 1:25 (hybridoma clone 5H6, a gift from Dominique Alfandari, University of Massachusetts, Amherst), mouse anti-GFP (B2, Santa Cruz), mouse anti-ZO1, 1:200 (Invitrogen), Cy3-conjugated donkey anti-rabbit IgG, 1:250 (Jackson ImmunoResearch), Cy2-conjugated donkey anti-mouse IgG, 1:250 (Jackson ImmunoResearch), Alexa Fluor488-conjugated donkey anti-mouse IgG, 1:250 (Jackson ImmunoResearch).

Fluorescent images were captured using AxioImager microscope (Zeiss) and Axiovision imaging software, or LSM880 Airyscan confocal microscope (Zeiss) and Zen (black edition) imaging

software. Z-stacks were acquired and maximum intensity projections were obtained by processing imaging files with Fiji (ImageJ).

For live imaging, embryos were injected with HA-Vangl2 (60 pg) and GFP-Pk3 (150 pg) RNAs in both animal dorsal blastomeres at the eight-cell stage and allowed to develop until stage 11.5. Then the embryos were mounted in 0.8% low melting point agarose in 0.1 X MMR in an imaging chamber formed by a glass slide and a glass coverslip separated by a spacer. Embryos were imaged from the dorsal side, from late gastrula to midneurula stages, one frame taken every 2 min. Three to five embryos were imaged in each experiment. AxioZoom fluorescent microscope (Zeiss) and Zen (blue edition) imaging software were used.

#### Quantification and statistical analysis

Vangl2 crescent scoring in the MLI experiments was performed using Fiji 'analyze particles' command (ImageJ). The ratio between the frequencies of polarized cells in the anterior and posterior NP was calculated by the following formula: anterior/posterior (A/P) ratio =  $(N_{CA}/tN_A) / (N_{CP}/tN_P)$  ( $N_C$ , number of crescents;  $tN$ , total number of cells). For the analysis of Vangl2 localization in wild-type embryos at different developmental stages, the frequency of cells showing Vangl2 anterior localization was calculated over the total number of neuroectodermal cells expressing ZO-1. Average and standard deviation (s.d.) were calculated with Microsoft Excel. Histograms representing data quantifications were obtained using Microsoft Excel.

Vangl2/GFP-Pk3 aggregate orientation was quantified using Fiji (ImageJ). For each sample, all cells with clear crescents within an area of 0.25 mm<sup>2</sup> posterior to the grafted tissue were analyzed. For each cell, a line connecting the two extremities of the crescent and an arrow perpendicular to this line were drawn, and the angle ( $\alpha$ ) between this arrow and the antero-posterior axis was measured, as shown in Fig. S1A', B'. Anterior, lateral and posterior orientation of the crescents were defined by the  $\alpha$  angle as described in Fig. S1. For each cell, the distance from the graft was also measured. For the control NP, the anterior and posterior regions were defined as the regions within 250 µm from the geometric center in the respective directions. Due to the size and the position of the transplant, the analyzed regions were subdivided into anterior (within 150 µm from the graft) and posterior (further than 150 µm from the graft) as shown in Fig. S3A. Measured crescent angles were presented as rose plots obtained by using Matlab\_R2019a and also shown as function of their distance from the graft in scatter plots obtained using Microsoft Excel. For linear statistic mean comparison, Student's *t*-test was used. Circular statistics analysis was performed with Matlab\_R2019a Circular Statistic Toolbox.

#### Acknowledgements

We thank Dominique Alfandari for the anti-Sox3 antibody (supported by the NIH grant R24OD21485), Elena Torban and Robert Vignali for the comments on the manuscript. We are grateful to Jakub Harnos for encouragement and advice, Miho Matsuda for help with confocal microscopy, and all members of the Sokol laboratory for numerous discussions. We acknowledge the use of confocal microscopes and advice from the MSSM Microscopy Core.

#### Competing interests

The authors declare no competing or financial interests.

#### Author contributions

Conceptualization: P.M., S.Y.S.; Methodology: P.M., O.O., S.Y.S.; Validation: P.M.; Formal analysis: P.M.; Investigation: P.M., O.O., S.Y.S.; Resources: S.Y.S.; Data

curation: O.O.; Writing - original draft: P.M., S.Y.S.; Writing - review & editing: O.O.; Visualization: O.O.; Supervision: S.Y.S.; Funding acquisition: S.Y.S.

## Funding

This study was funded by the National Institutes of Health grants R35GM122492 and R01NS100759 to S.Y.S.

## References

- Aigouy, B., Farhadifar, R., Staple, D. B., Sagner, A., Roper, J. C., Julicher, F. and Eaton, S. (2010). Cell flow reorients the axis of planar polarity in the wing epithelium of *Drosophila*. *Cell* **142**, 773-786. doi:10.1016/j.cell.2010.07.042
- Antic, D., Stubbs, J. L., Suyama, K., Kintner, C., Scott, M. P. and Axelrod, J. D. (2010). Planar cell polarity enables posterior localization of nodal cilia and left-right axis determination during mouse and *Xenopus* embryogenesis. *PLoS ONE* **5**, e8999. doi:10.1371/journal.pone.0008999
- Aw, W. Y. and Devenport, D. (2017). Planar cell polarity: global inputs establishing cellular asymmetry. *Curr. Opin. Cell Biol.* **44**, 110-116. doi:10.1016/j.cub.2016.08.002
- Aw, W. Y., Heck, B. W., Joyce, B. and Devenport, D. (2016). Transient tissue-scale deformation coordinates alignment of planar cell polarity junctions in the mammalian skin. *Curr. Biol.* **26**, 2090-2100. doi:10.1016/j.cub.2016.06.030
- Borovina, A., Superina, S., Voskas, D. and Ciruna, B. (2010). Vangl2 directs the posterior tilting and asymmetric localization of motile primary cilia. *Nat. Cell Biol.* **12**, 407-412. doi:10.1038/ncb2042
- Butler, M. T. and Wallingford, J. B. (2017). Planar cell polarity in development and disease. *Nat. Rev. Mol. Cell Biol.* **18**, 375-388. doi:10.1038/nrm.2017.11
- Butler, M. T. and Wallingford, J. B. (2018). Spatial and temporal analysis of PCP protein dynamics during neural tube closure. *Elife* **7**, e36456. doi:10.7554/eLife.36456
- Chien, Y. H., Keller, R., Kintner, C. and Shook, D. R. (2015). Mechanical strain determines the axis of planar polarity in ciliated epithelia. *Curr. Biol.* **25**, 2774-2784. doi:10.1016/j.cub.2015.09.015
- Chu, C. W., Ossipova, O., Ioannou, A. and Sokol, S. Y. (2016). Prickle3 synergizes with Wtp1 to regulate basal body organization and cilia growth. *Sci. Rep.* **6**, 24104. doi:10.1038/srep24104
- Chu, C. W. and Sokol, S. Y. (2016). Wnt proteins can direct planar cell polarity in vertebrate ectoderm. *Elife* **5**, e16463. doi:10.7554/eLife.16463.013
- Chuykin, I., Ossipova, O. and Sokol, S. Y. (2018). Par3 interacts with Prickle3 to generate apical PCP complexes in the vertebrate neural plate. *Elife* **7**, e37881. doi:10.7554/eLife.37881
- Ciruna, B., Jenny, A., Lee, D., Mlodzik, M. and Schier, A. F. (2006). Planar cell polarity signalling couples cell division and morphogenesis during neurulation. *Nature* **439**, 220-224. doi:10.1038/nature04375
- De Robertis, E. M. and Kuroda, H. (2004). Dorsal-ventral patterning and neural induction in *Xenopus* embryos. *Annu. Rev. Cell Dev. Biol.* **20**, 285-308. doi:10.1146/annurev.cellbio.20.011403.154124
- Devenport, D. (2014). The cell biology of planar cell polarity. *J. Cell Biol.* **207**, 171-179. doi:10.1083/jcb.201408039
- Dollar, G. L., Weber, U., Mlodzik, M. and Sokol, S. Y. (2005). Regulation of Lethal giant larvae by Dishevelled. *Nature* **437**, 1376-1380. doi:10.1038/nature04116
- Ewen-Campen, B., Comyn, T., Vogt, E. and Perrimon, N. (2020). No evidence that Wnt ligands are required for planar cell polarity in *Drosophila*. *Cell Rep* **32**, 108121. doi:10.1016/j.celrep.2020.108121
- Fisher, K. H. and Strutt, D. (2019). A theoretical framework for planar polarity establishment through interpretation of graded cues by molecular bridges. *Development* **146**, dev168955. doi:10.1242/dev.168955
- Gao, B., Song, H., Bishop, K., Elliot, G., Garrett, L., English, M. A., Andre, P., Robinson, J., Sood, R., Minami, Y. et al. (2011). Wnt signaling gradients establish planar cell polarity by inducing Vangl2 phosphorylation through Ror2. *Dev. Cell* **20**, 163-176. doi:10.1016/j.devcel.2011.01.001
- Goodrich, L. V. and Strutt, D. (2011). Principles of planar polarity in animal development. *Development* **138**, 1877-1892. doi:10.1242/dev.054080
- Gray, R. S., Roszko, I. and Solnica-Krezel, L. (2011). Planar cell polarity: coordinating morphogenetic cell behaviors with embryonic polarity. *Dev. Cell* **21**, 120-133. doi:10.1016/j.devcel.2011.06.011
- Habas, R., Kato, Y. and He, X. (2001). Wnt/Frizzled activation of Rho regulates vertebrate gastrulation and requires a novel Formin homology protein Daam1. *Cell* **107**, 843-854. doi:10.1016/S0092-8674(01)00614-6
- Harland, R. M. (1991). In situ hybridization: an improved whole-mount method for *Xenopus* embryos. *Methods Cell Biol.* **36**, 685-695. doi:10.1016/S0091-679X(08)60307-6
- Harland, R. (2000). Neural induction. *Curr. Opin. Genet. Dev.* **10**, 357-362. doi:10.1016/S0959-437X(00)00096-4
- Hashimoto, M., Shinohara, K., Wang, J., Ikeuchi, S., Yoshida, S., Meno, C., Nonaka, S., Takada, S., Hatta, K., Wynshaw-Boris, A. et al. (2010). Planar polarization of node cells determines the rotational axis of node cilia. *Nat. Cell Biol.* **12**, 170-176. doi:10.1038/ncb2020
- Holtfreter, J. (1933). Die totale Exogastrulation, eine Selbstablösung des Ektoderms vom Entomesoderm. *Wilhelm Roux' Archiv für Entwicklungsmechanik der Organismen* **129**, 669-793. doi:10.1007/BF00656583
- Lawrence, P. A. (1966). Gradients in the insect segment: the orientation of hairs in the milkweed bug *Oncopeltus Fasciatus*. *J. Exp. Biol.* **44**, 607-620. doi:10.1242/jeb.44.3.607
- Marlow, F., Topczewski, J., Sepich, D. and Solnica-Krezel, L. (2002). Zebrafish Rho kinase 2 acts downstream of Wnt11 to mediate cell polarity and effective convergence and extension movements. *Curr. Biol.* **12**, 876-884. doi:10.1016/S0969-9822(02)00864-3
- McGreevy, E. M., Vijayraghavan, D., Davidson, L. A. and Hildebrand, J. D. (2015). Shroom3 functions downstream of planar cell polarity to regulate myosin II distribution and cellular organization during neural tube closure. *Biol. Open* **4**, 186-196. doi:10.1242/bio.20149589
- Minegishi, K., Hashimoto, M., Ajima, R., Takaoka, K., Shinohara, K., Ikawa, Y., Nishimura, H., McMahon, A. P., Willert, K., Okada, Y. et al. (2017). A Wnt5 activity asymmetry and intercellular signaling via PCP proteins polarize node cells for left-right symmetry breaking. *Dev. Cell* **40**, 439-452.e4. doi:10.1016/j.devcel.2017.02.010
- Mitchell, B., Stubbs, J. L., Huisman, F., Taborek, P., Yu, C. and Kintner, C. (2009). The PCP pathway instructs the planar orientation of ciliated cells in the *Xenopus* larval skin. *Curr. Biol.* **19**, 924-929. doi:10.1016/j.cub.2009.04.018
- Newport, J. and Kirschner, M. (1982). A major developmental transition in early *Xenopus* embryos: I. characterization and timing of cellular changes at the midblastula stage. *Cell* **30**, 675-686. doi:10.1016/0092-8674(82)90272-0
- Nieuwkoop, P. D. and Faber, J. (1967). *Normal Table of Xenopus laevis (Daudin)*. Amsterdam: North Holland.
- Nikolopoulou, E., Galea, G. L., Rolo, A., Greene, N. D. and Copp, A. J. (2017). Neural tube closure: cellular, molecular and biomechanical mechanisms. *Development* **144**, 552-566. doi:10.1242/dev.145904
- Nishimura, T., Honda, H. and Takeichi, M. (2012). Planar cell polarity links axes of spatial dynamics in neural-tube closure. *Cell* **149**, 1084-1097. doi:10.1016/j.cell.2012.04.021
- Ossipova, O., Chuykin, I., Chu, C. W. and Sokol, S. Y. (2015a). Vangl2 cooperates with Rab11 and Myosin V to regulate apical constriction during vertebrate gastrulation. *Development* **142**, 99-107. doi:10.1242/dev.111161
- Ossipova, O., Kim, K. and Sokol, S. Y. (2015b). Planar polarization of Vangl2 in the vertebrate neural plate is controlled by Wnt and Myosin II signaling. *Biol. Open* **4**, 722-730. doi:10.1242/bio.201511676
- Peng, Y. and Axelrod, J. D. (2012). Asymmetric protein localization in planar cell polarity: mechanisms, puzzles, and challenges. *Curr. Top. Dev. Biol.* **101**, 33-53. doi:10.1016/B978-0-12-394592-1.00002-8
- Poznanski, A. and Keller, R. (1997). The role of planar and early vertical signaling in patterning the expression of Hoxb-1 in *Xenopus*. *Dev. Biol.* **184**, 351-366. doi:10.1006/dbio.1996.8500
- Sagner, A., Merkel, M., Aigouy, B., Gaebel, J., Brankatschk, M., Julicher, F. and Eaton, S. (2012). Establishment of global patterns of planar polarity during growth of the *Drosophila* wing epithelium. *Curr. Biol.* **22**, 1296-1301. doi:10.1016/j.cub.2012.04.066
- Sienknecht, U. J., Anderson, B. K., Parodi, R. M., Fantetti, K. N. and Fekete, D. M. (2011). Non-cell-autonomous planar cell polarity propagation in the auditory sensory epithelium of vertebrates. *Dev. Biol.* **352**, 27-39. doi:10.1016/j.ydbio.2011.01.009
- Strutt, D. I., Weber, U. and Mlodzik, M. (1997). The role of RhoA in tissue polarity and Frizzled signalling. *Nature* **387**, 292-295. doi:10.1038/387292a0
- Tian, T., Lei, Y., Chen, Y., Karki, M., Jin, L., Finnell, R. H., Wang, L. and Ren, A. (2020). Somatic mutations in planar cell polarity genes in neural tissue from human fetuses with neural tube defects. *Hum. Genet.* **139**, 1299-1314. doi:10.1007/s00439-020-02172-0
- Vicente-Manzanares, M., Ma, X., Adelstein, R. S. and Horwitz, A. R. (2009). Non-muscle myosin II takes centre stage in cell adhesion and migration. *Nat. Rev. Mol. Cell Biol.* **10**, 778-790. doi:10.1038/nrm2786
- Vinson, C. R. and Adler, P. N. (1987). Directional non-cell autonomy and the transmission of polarity information by the frizzled gene of *Drosophila*. *Nature* **329**, 549-551. doi:10.1038/329549a0
- Vladar, E. K., Antic, D. and Axelrod, J. D. (2009). Planar cell polarity signaling: the developing cell's compass. *Cold Spring Harb. Perspect Biol.* **1**, a002964. doi:10.1101/cshperspect.a002964
- Weiser, D. C., Row, R. H. and Kimelman, D. (2009). Rho-regulated myosin phosphatase establishes the level of protrusive activity required for cell movements during zebrafish gastrulation. *Development* **136**, 2375-2384. doi:10.1242/dev.034892
- Winter, C. G., Wang, B., Ballew, A., Royou, A., Karess, R., Axelrod, J. D. and Luo, L. (2001). *Drosophila* Rho-associated kinase (Drok) links Frizzled-mediated planar cell polarity signaling to the actin cytoskeleton. *Cell* **105**, 81-91. doi:10.1016/S0092-8674(01)00298-7

- Wu, J., Roman, A. C., Carvajal-Gonzalez, J. M. and Mlodzik, M.** (2013). Wg and Wnt4 provide long-range directional input to planar cell polarity orientation in *Drosophila*. *Nat. Cell Biol.* **15**, 1045-1055. doi:10.1038/ncb2806
- Yang, W., Garrett, L., Feng, D., Elliott, G., Liu, X., Wang, N., Wong, Y. M., Choi, N. T., Yang, Y. and Gao, B.** (2017). Wnt-induced Vangl2 phosphorylation is dose-dependently required for planar cell polarity in mammalian development. *Cell Res.* **27**, 1466-1484. doi:10.1038/cr.2017.127
